# Supplementary material
Source: PubMed Central journal article supplement (PMC6993063)

## Supplementary Material

### **An Expedient Synthesis of CMF-019: (*S*)-5-Methyl-3-{1-(pentan-3-yl)-2-(thiophen-2-ylmethyl)-1*H*-benzo[d]imidazole-5-carboxamido}hexanoic Acid, a Potent Apelin Receptor (APJ) Agonist**

Lena Trifonov<sup>1</sup>, Michal Afri<sup>1</sup>, Krzysztof Palczewski<sup>2</sup>, Edward E. Korshin<sup>1,\*</sup> and Arie Gruzman<sup>1,\*</sup>

<sup>1</sup>Department of Chemistry, Bar-Ilan University, Ramat-Gan, 5290002, Israel; <sup>2</sup>Department of Pharmacology, School of Medicine, Case Western Reserve University, Cleveland, OH, 44106-4965, USA

## **Contents**

|                                                                   |    |
|-------------------------------------------------------------------|----|
| 1. NMR spectra images.....                                        | 2  |
| 2. Mass spectroscopy data.....                                    | 16 |
| 3. Chiral HPLC report (methyl (S)-3-amino-5-methylhexanoate)..... | 22 |

## 1. NMR spectra images

<sup>1</sup>H-NMR (400MHz, CDCl<sub>3</sub>)

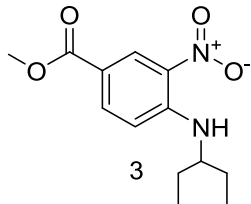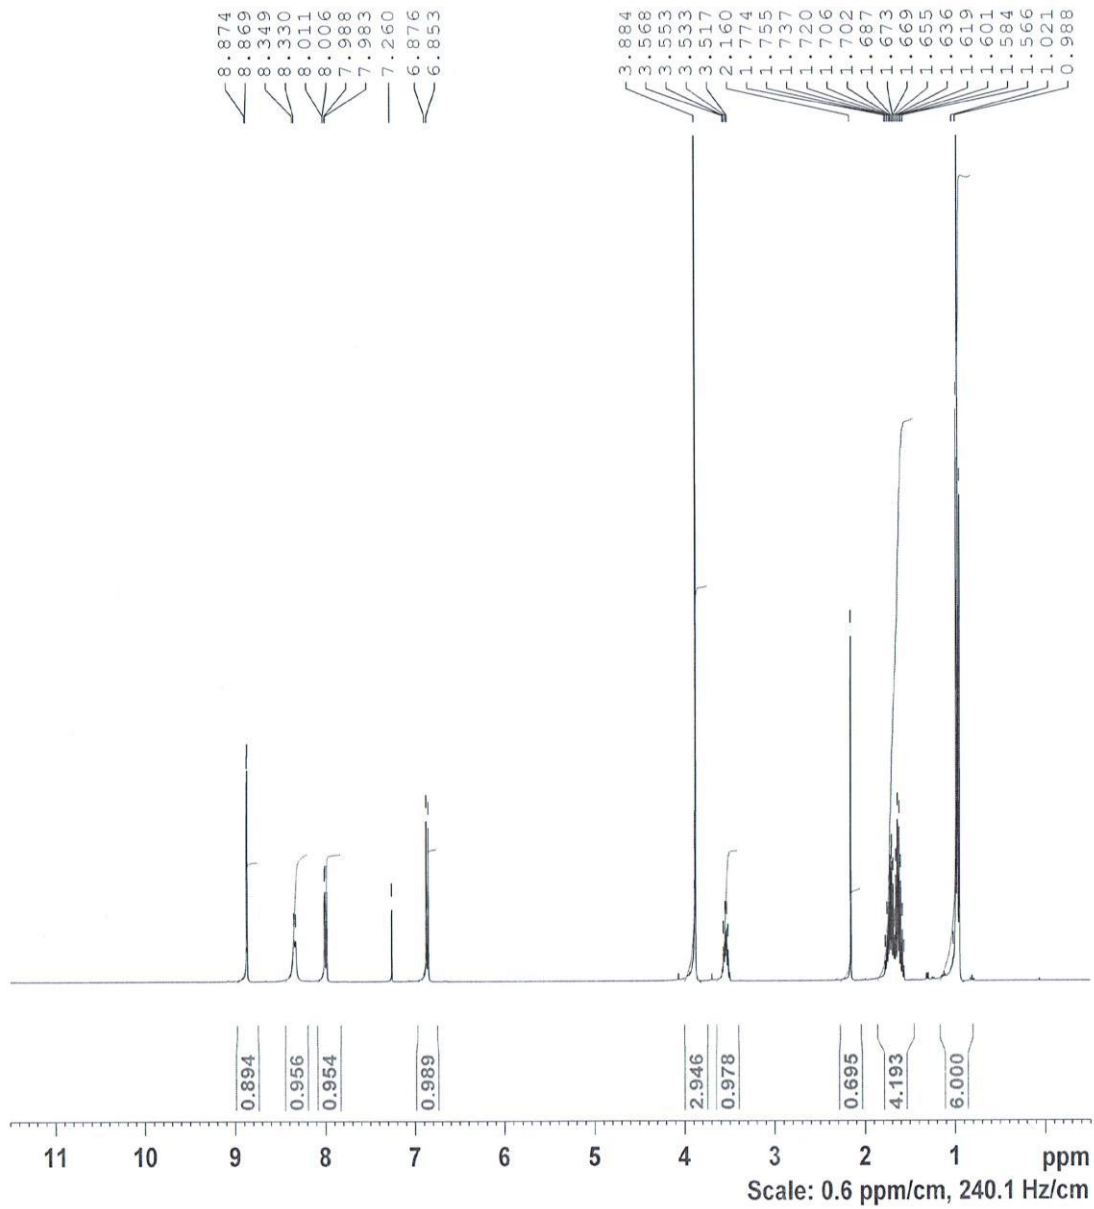

<sup>13</sup>C-NMR (100MHz, CDCl<sub>3</sub>)

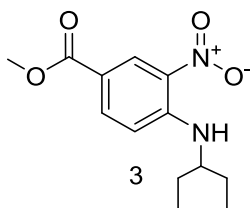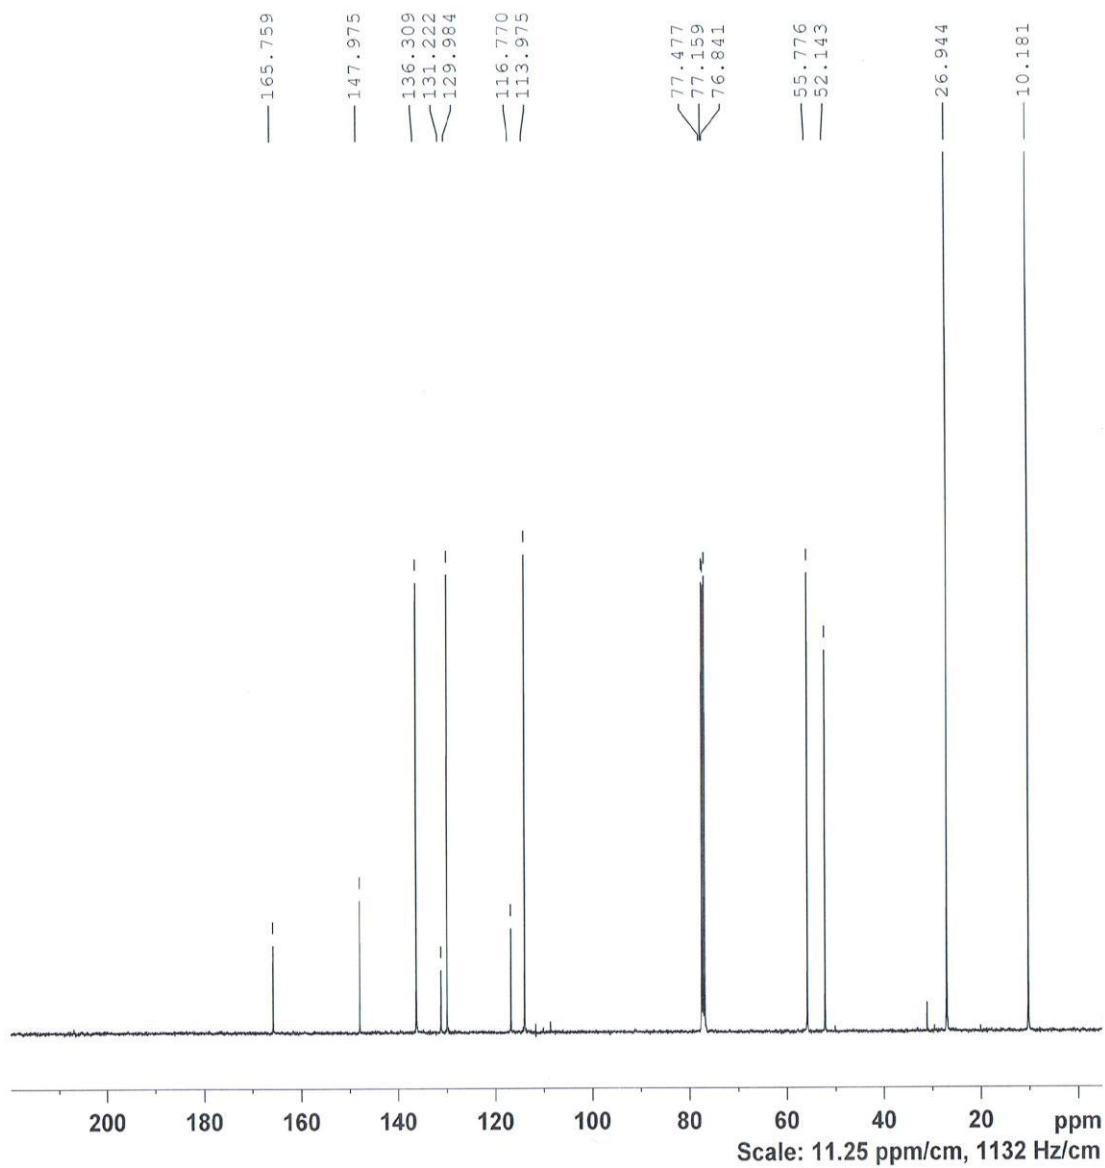

1H-NMR (400MHz, CDCl<sub>3</sub>)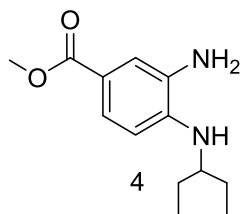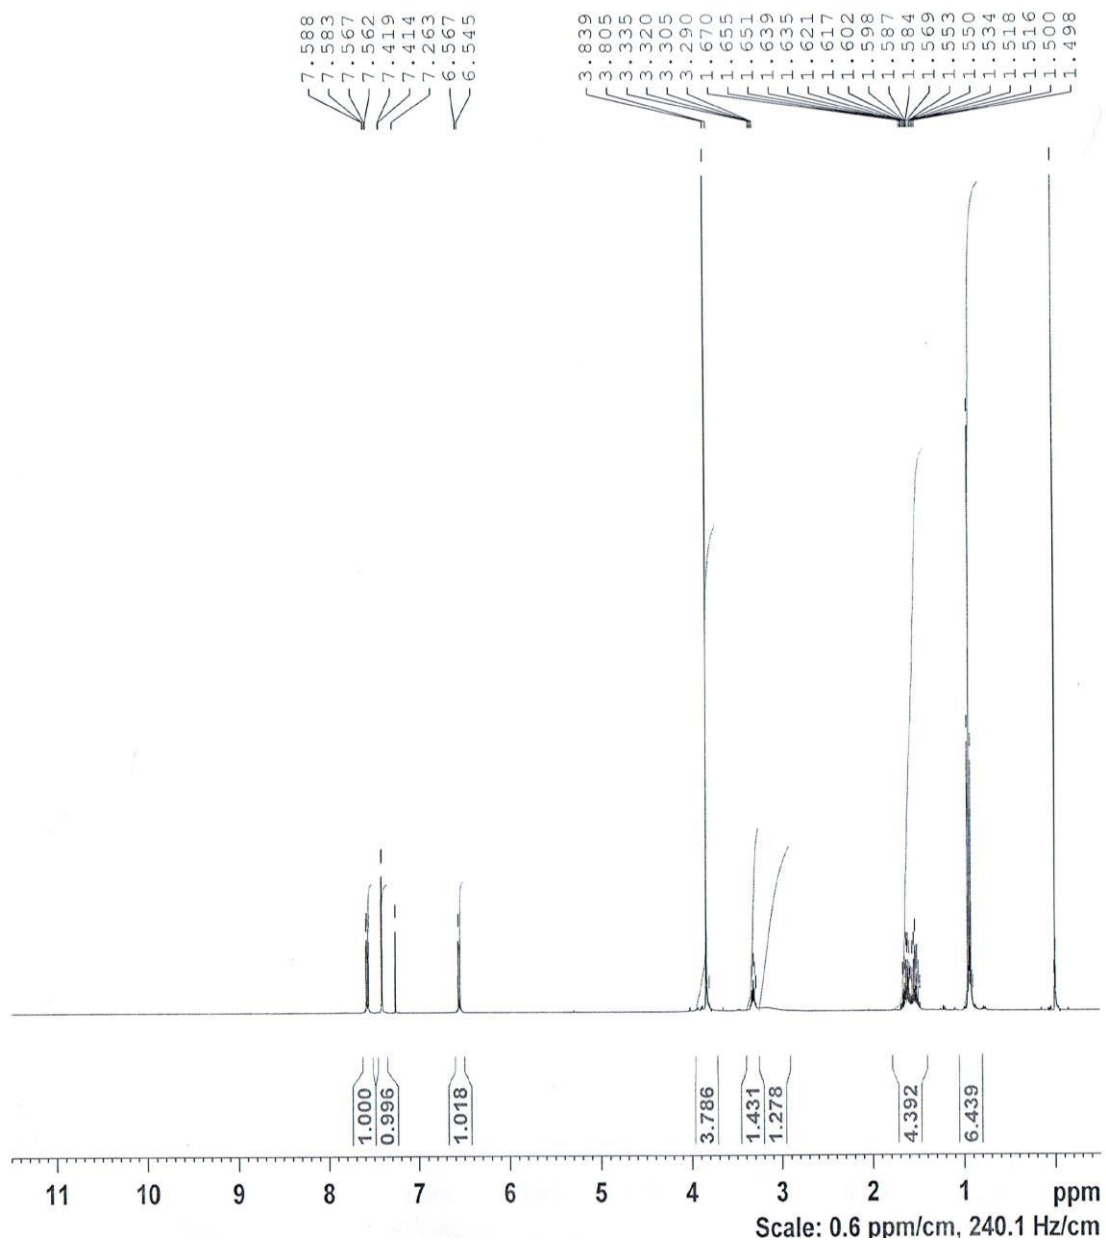

<sup>13</sup>C-NMR (100MHz, CDCl<sub>3</sub>)

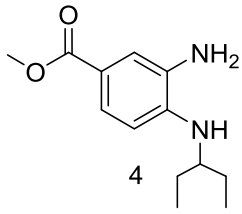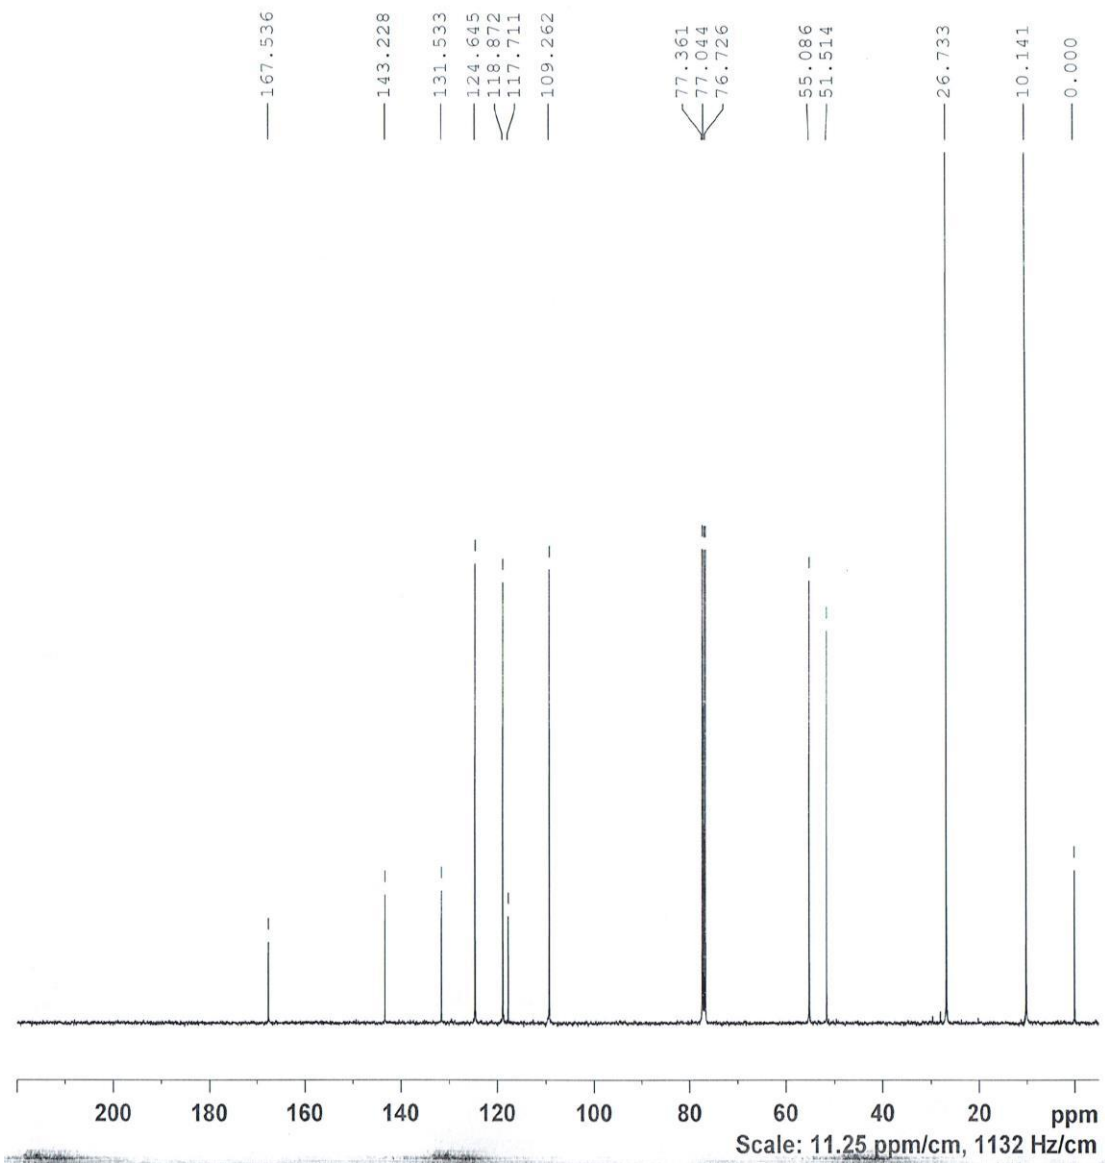

1H-NMR (400MHz, CDCl3)

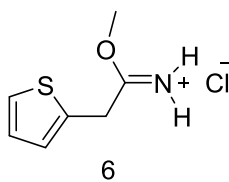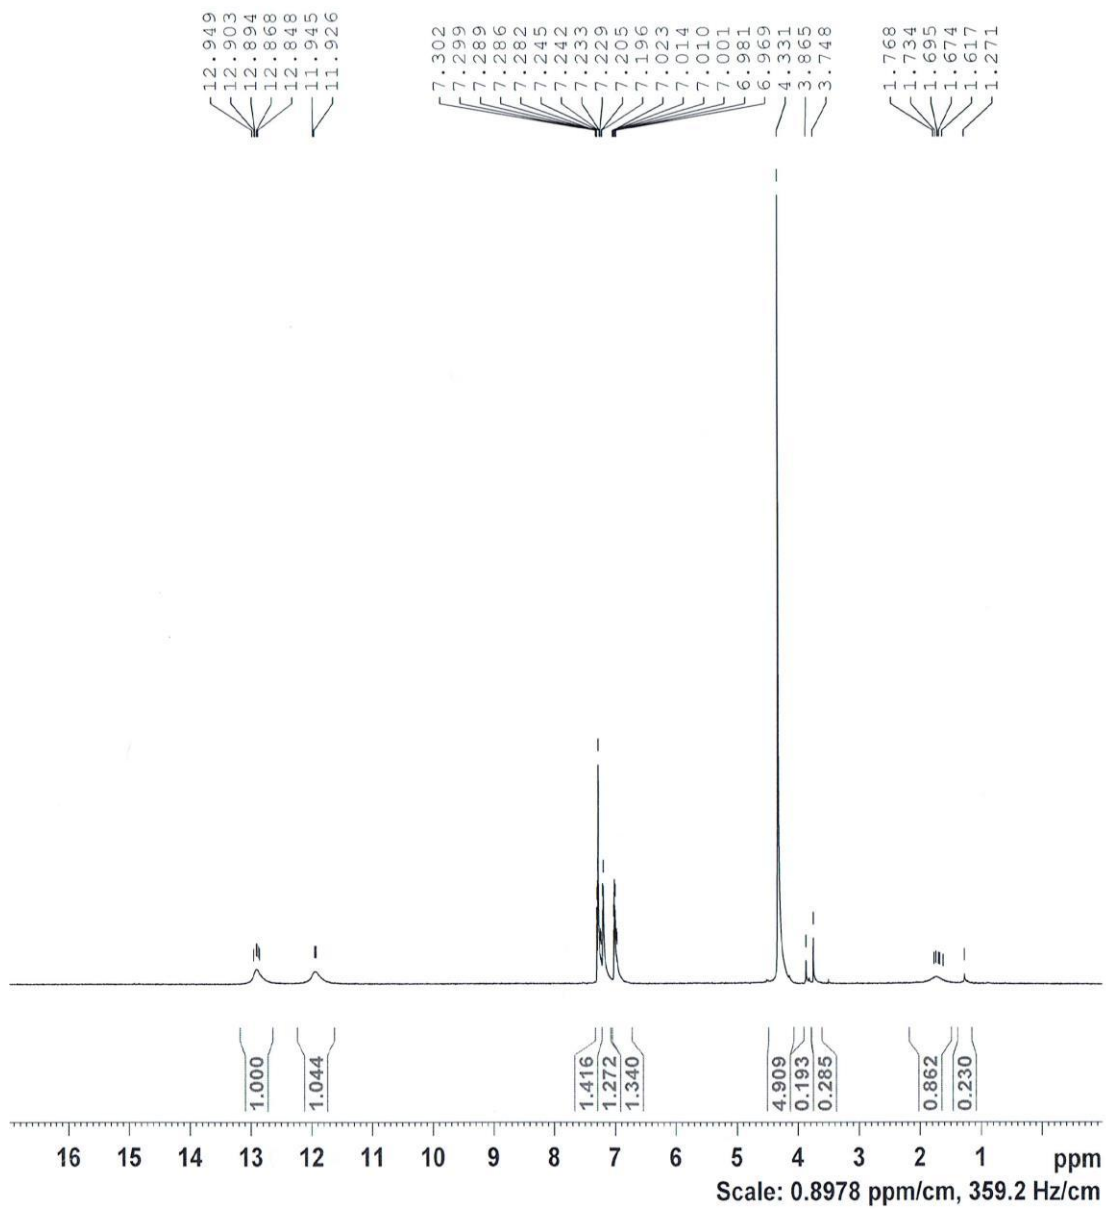

<sup>13</sup>C-NMR (100MHz, CDCl<sub>3</sub>)

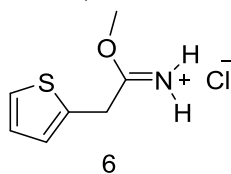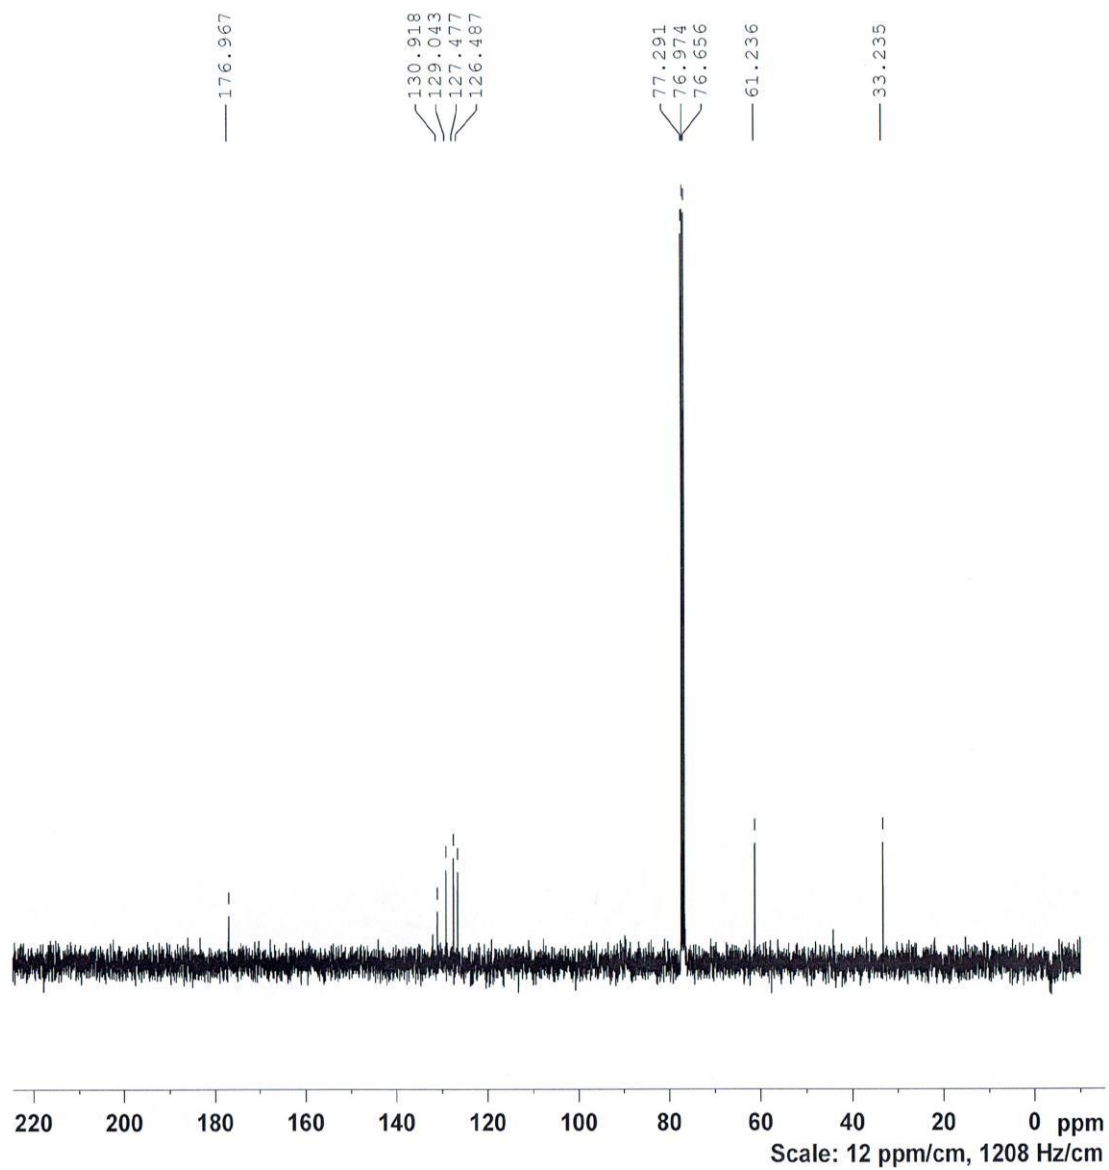



<sup>1</sup>H-NMR (400MHz, CDCl<sub>3</sub>)

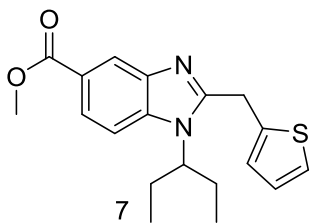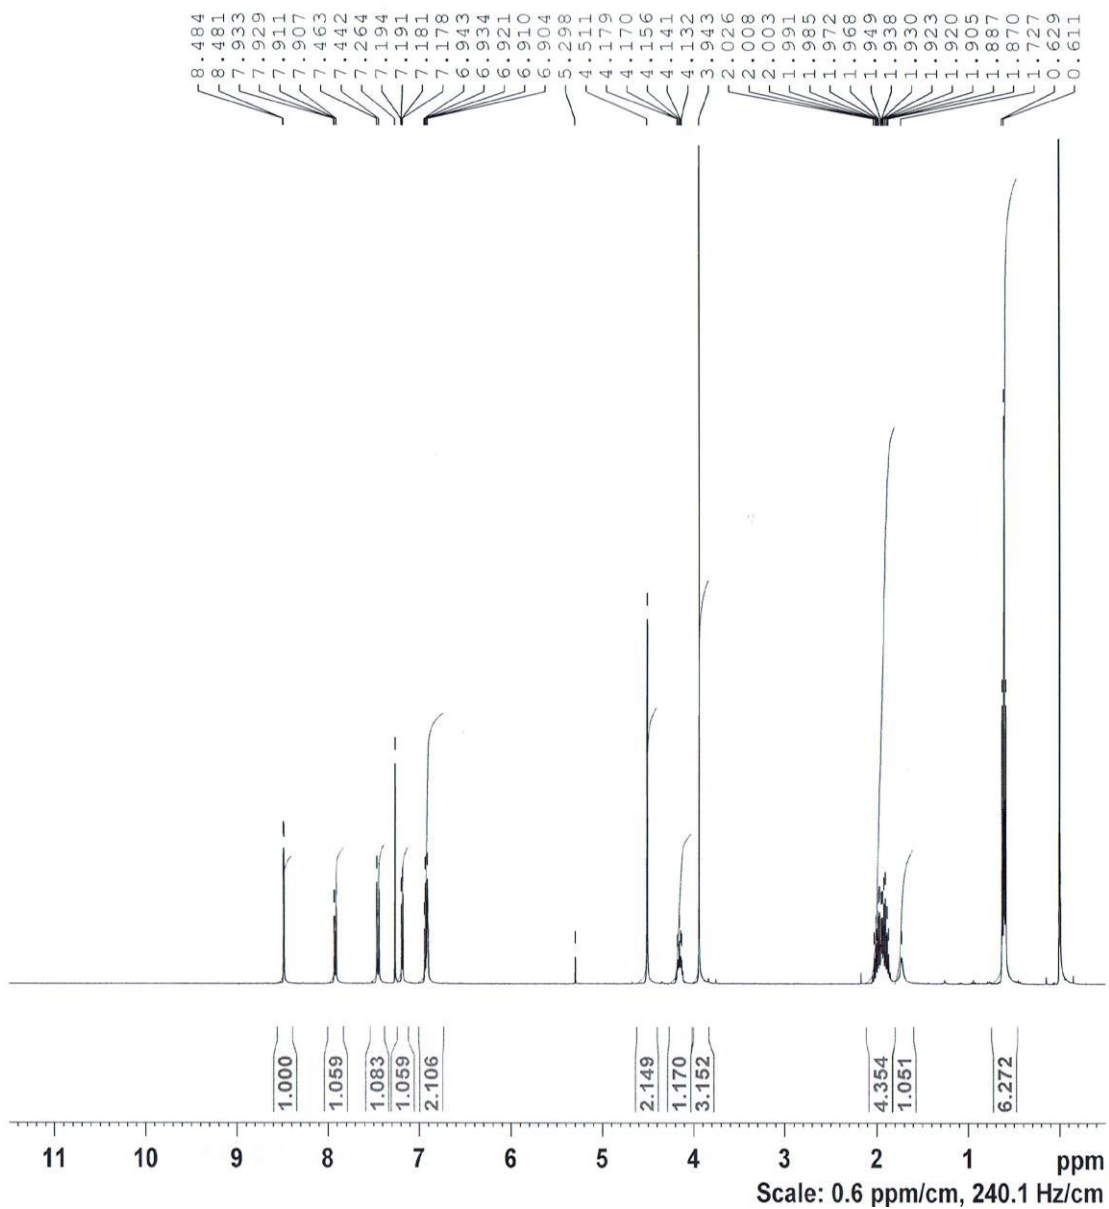

<sup>13</sup>C-NMR (100MHz, CDCl<sub>3</sub>)

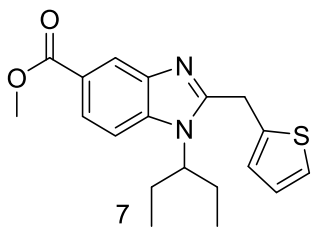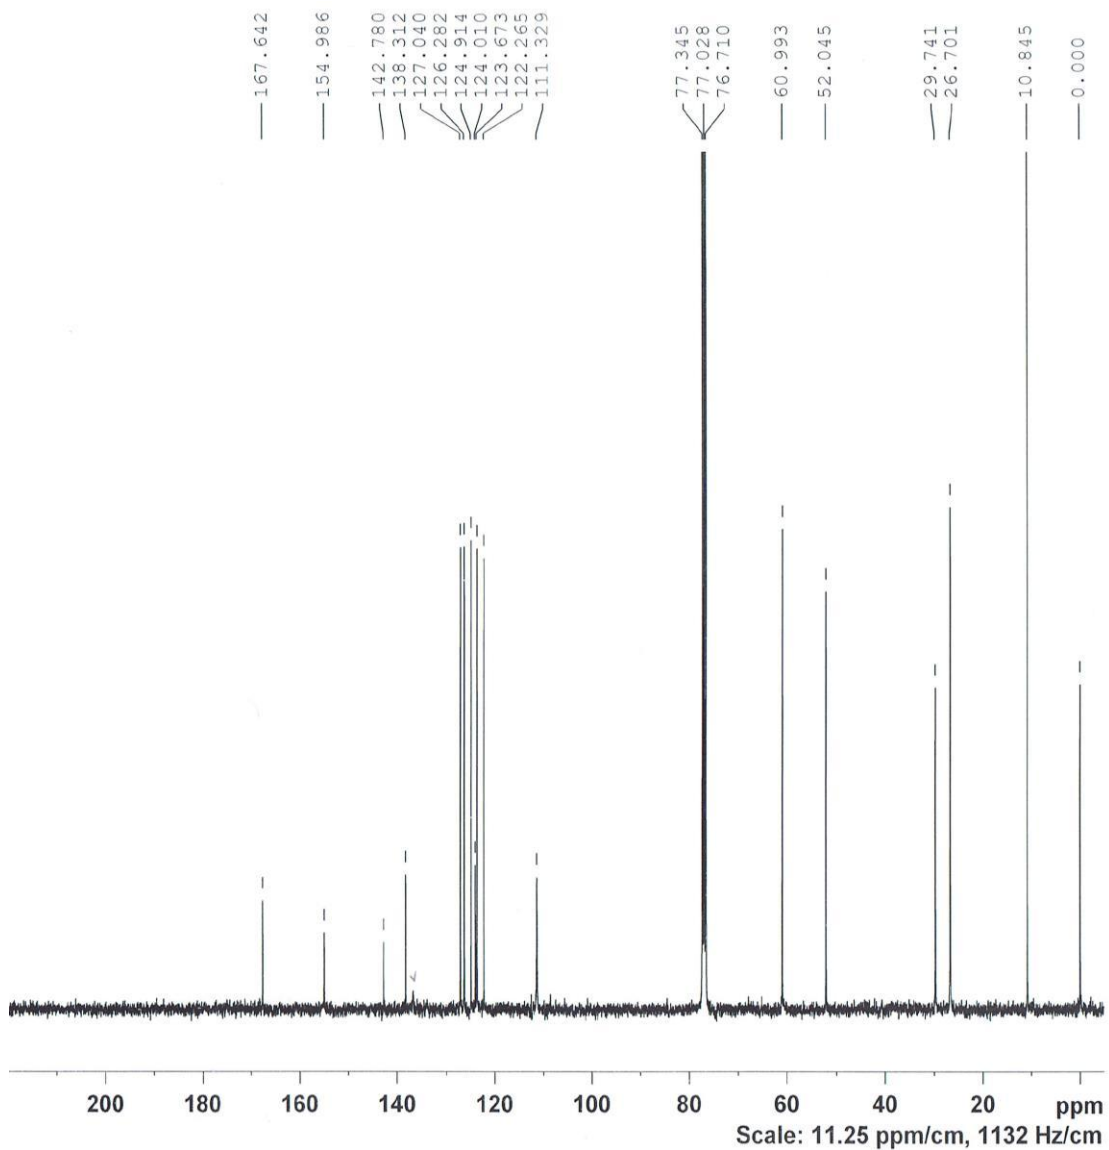

<sup>1</sup>H-NMR (700MHz, CDCl<sub>3</sub>)

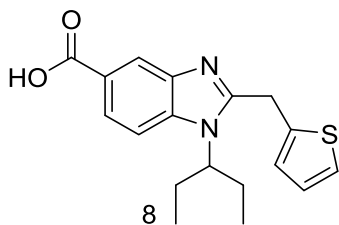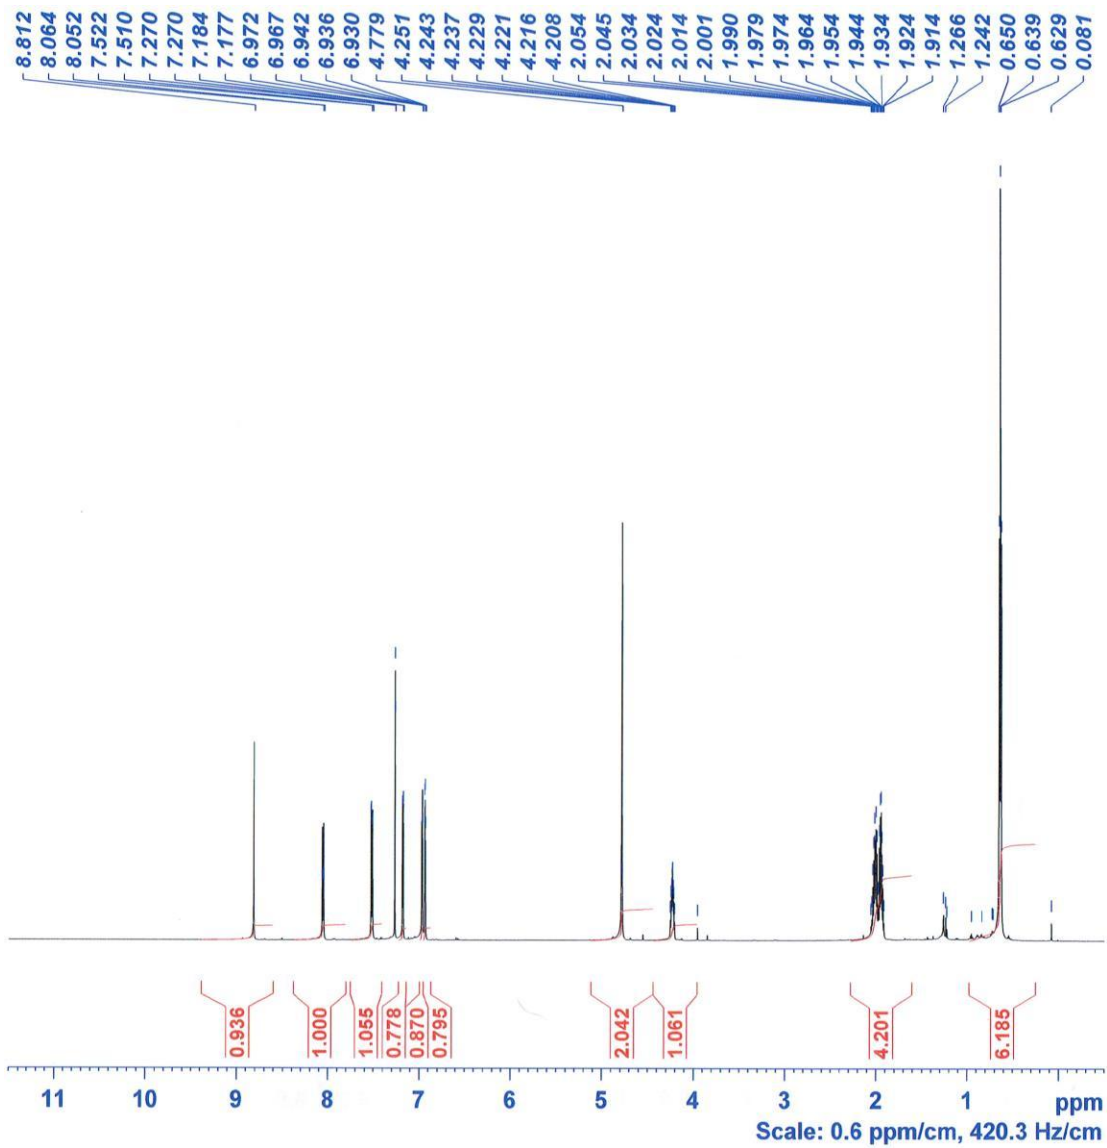

<sup>13</sup>C-NMR (175MHz, CDCl<sub>3</sub>)

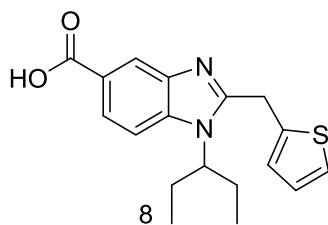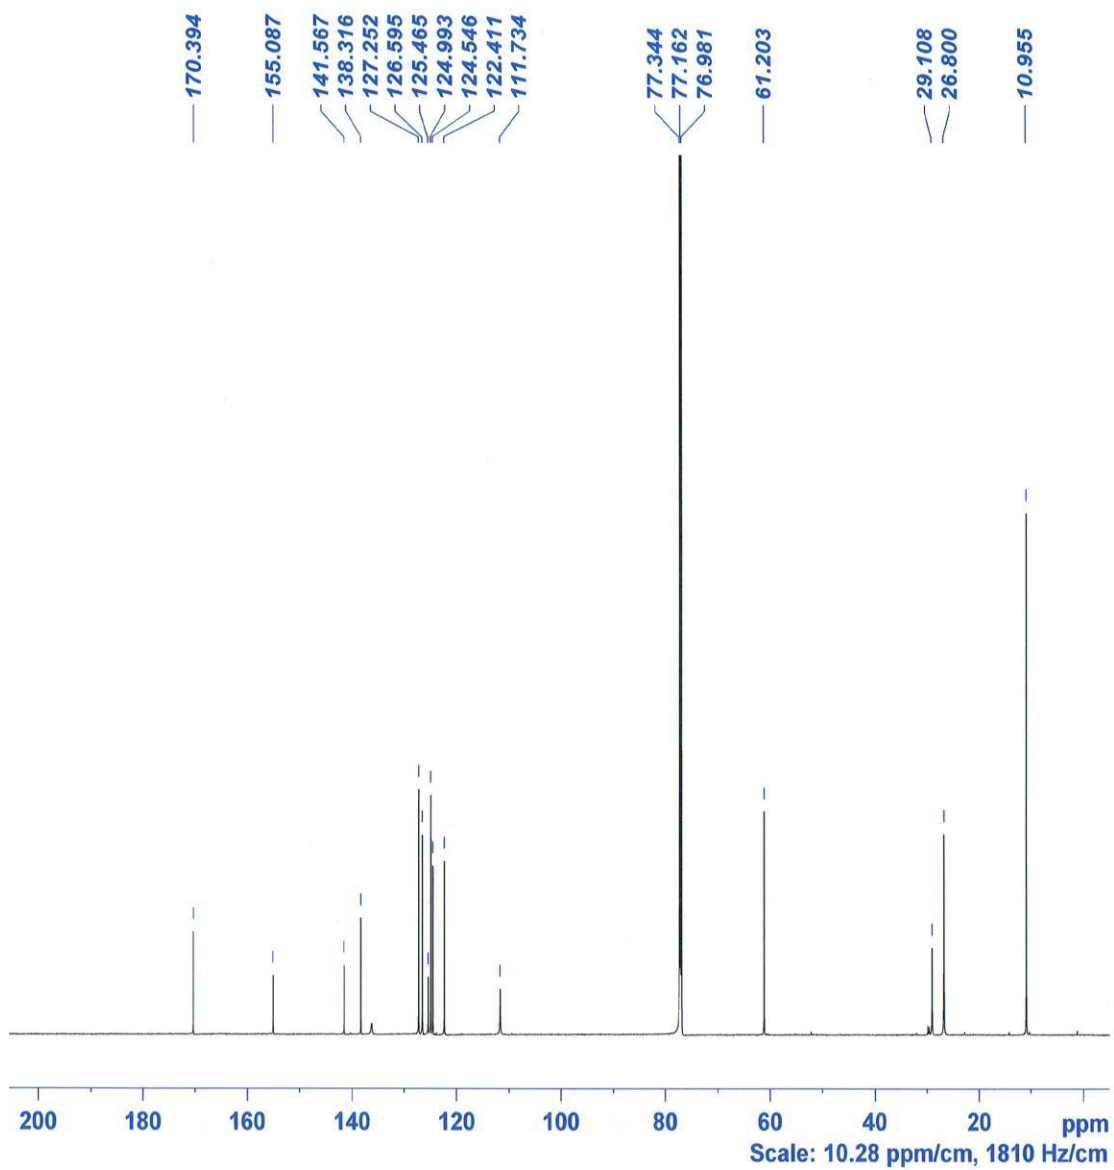

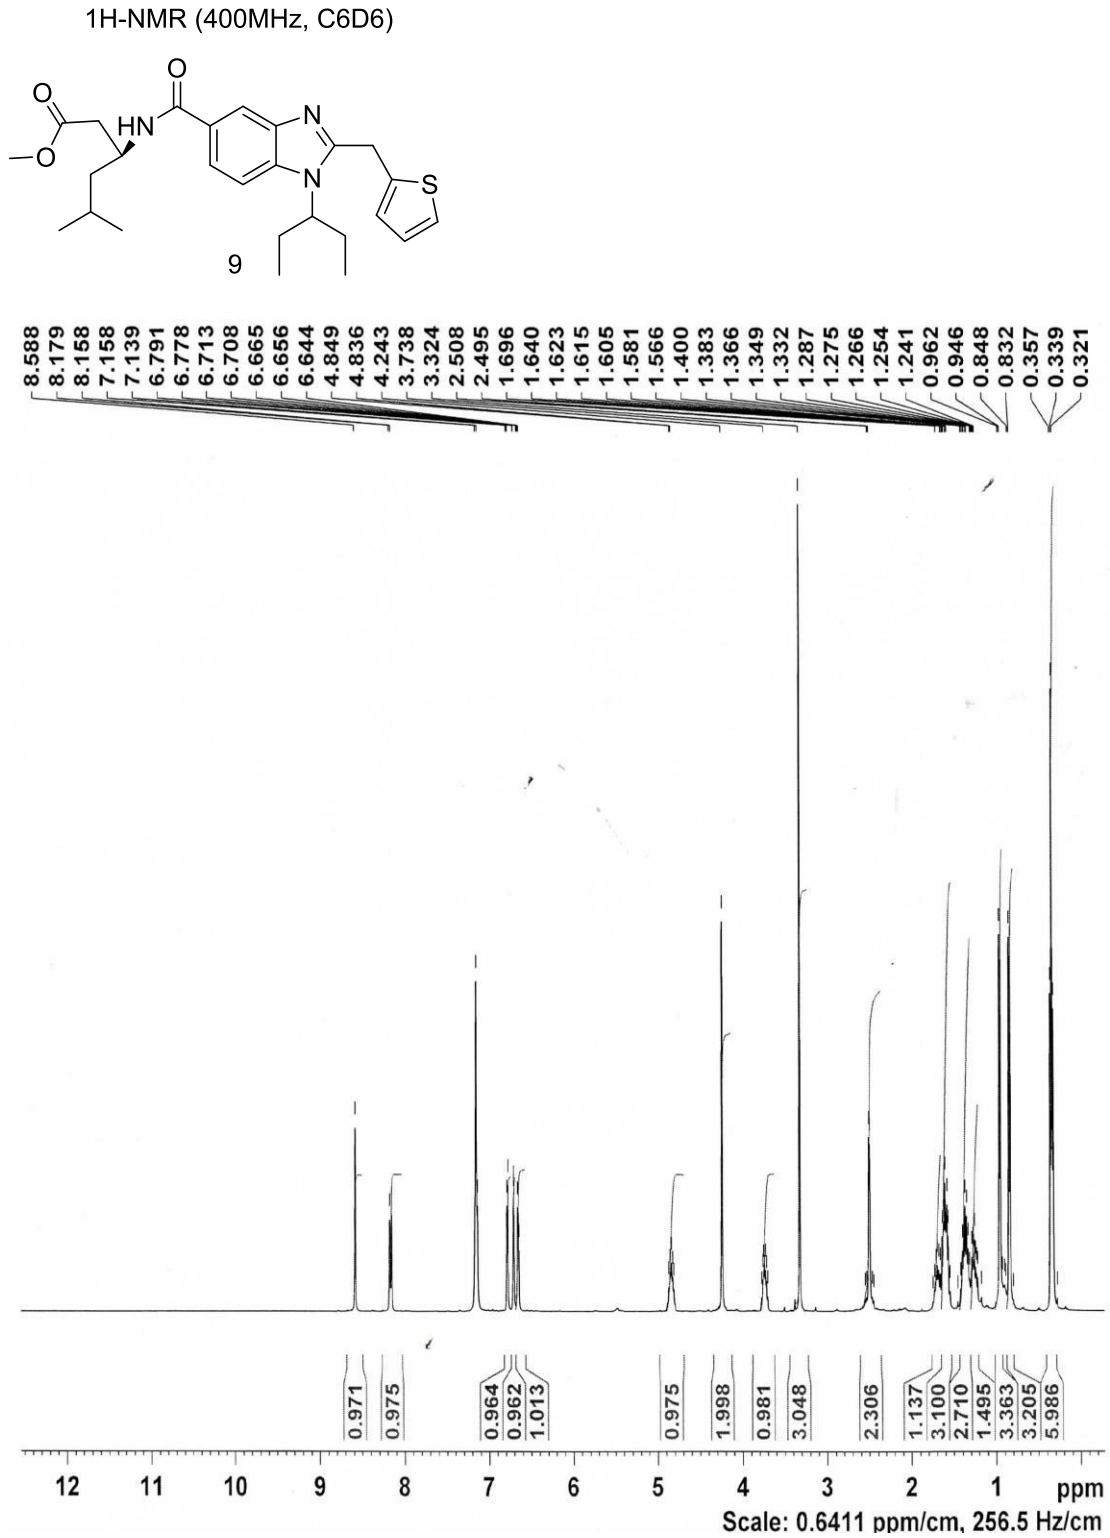

<sup>13</sup>C-NMR (100MHz, C6D6)

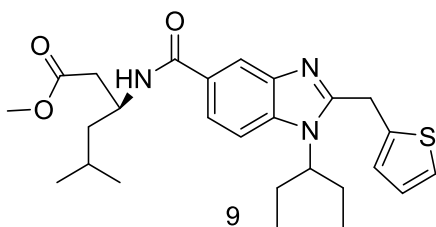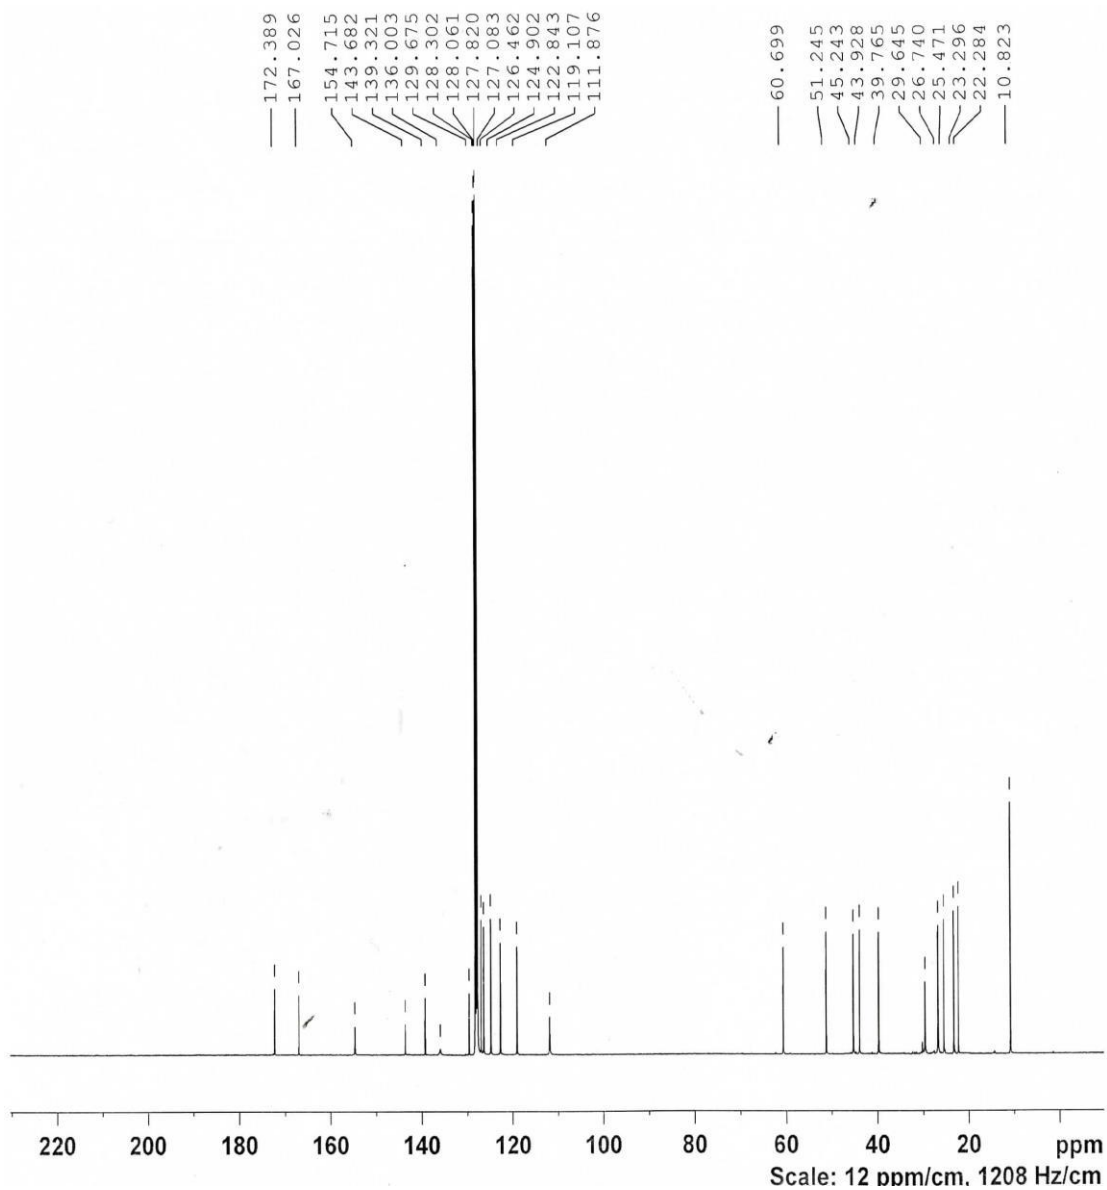

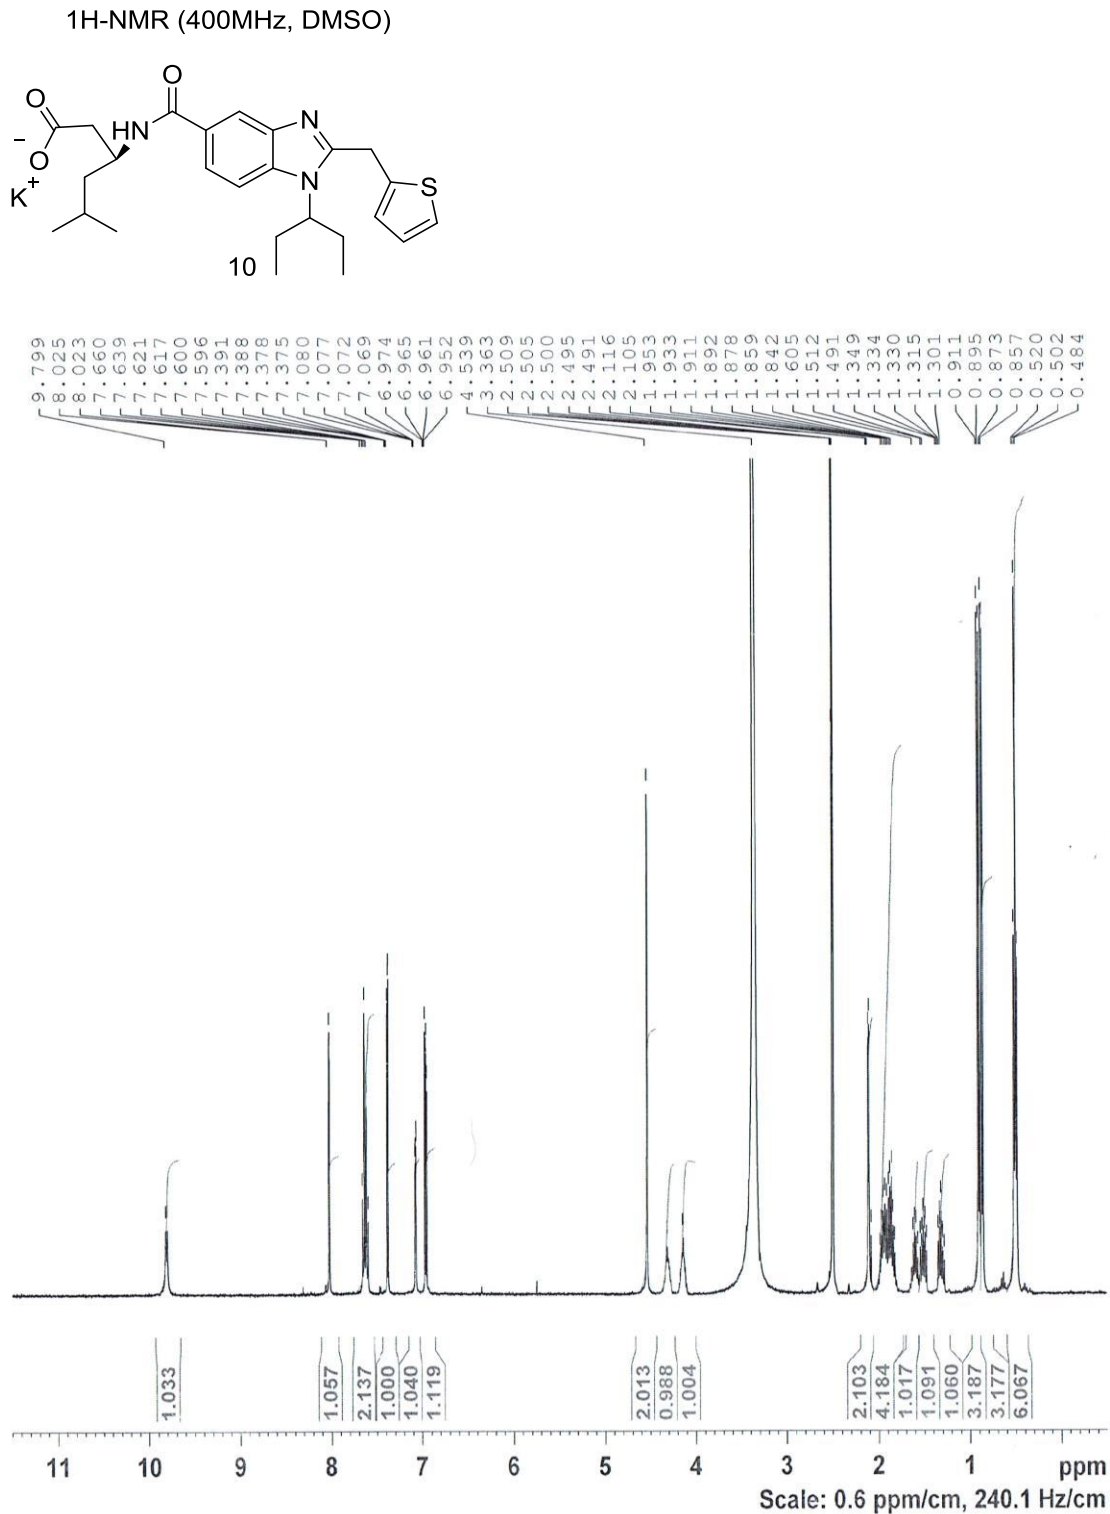

13C-NMR (100MHz, DMSO)

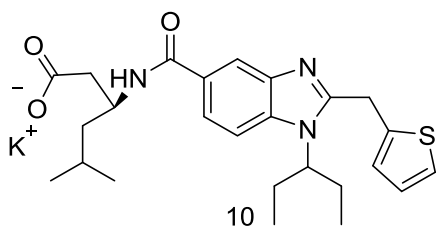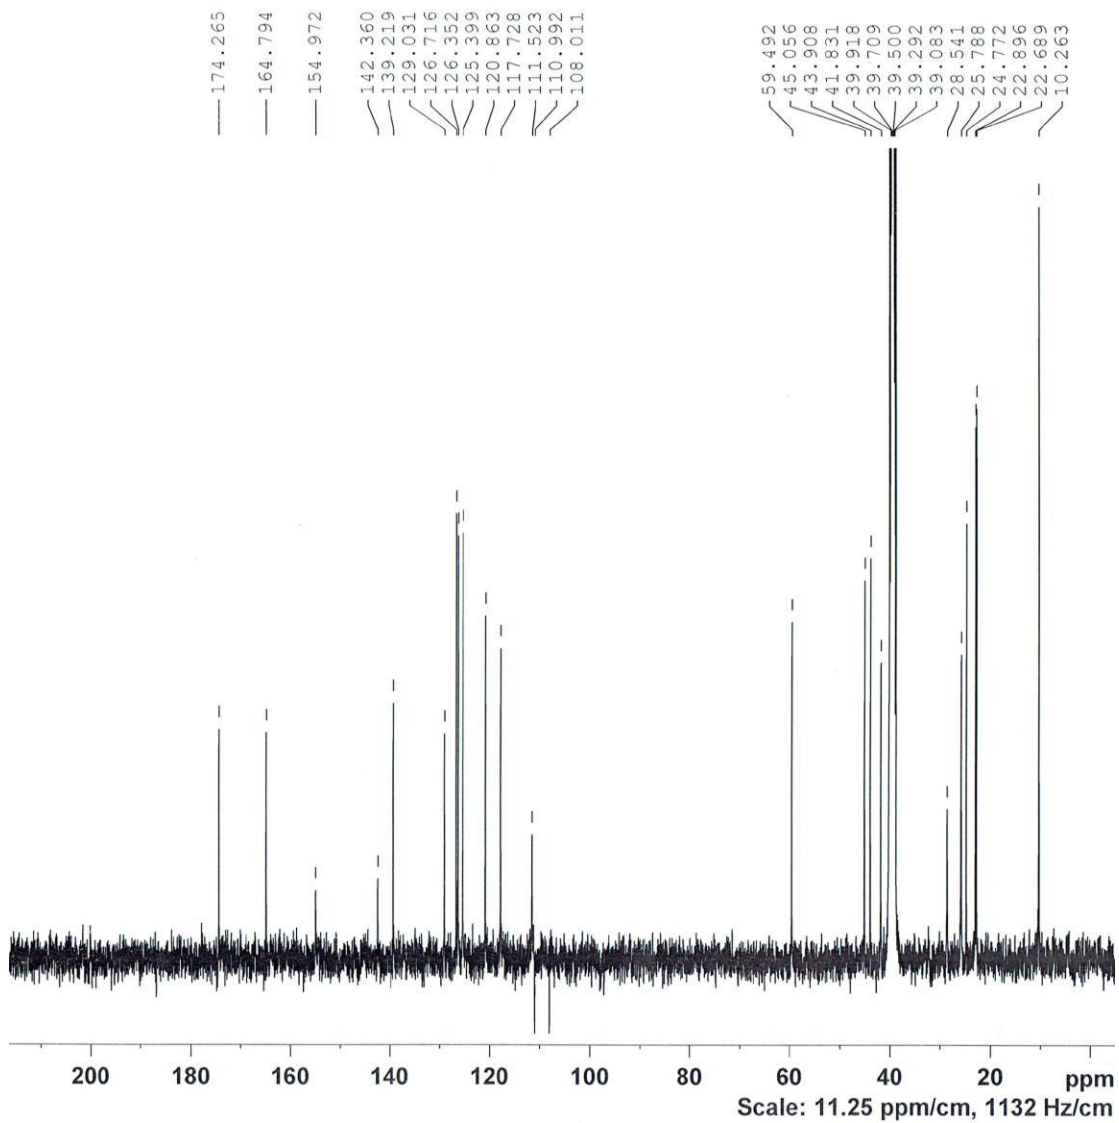



## 2. Mass Spectroscopy analytical data

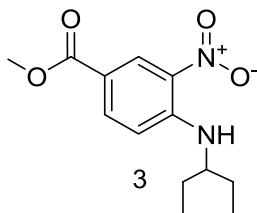

MS Spectrum

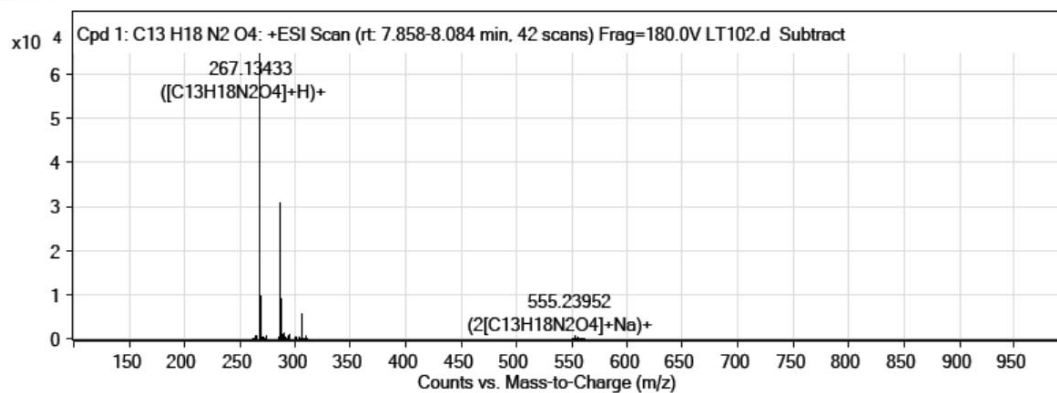

MS Spectrum Peak List

| m/z       | Calc m/z  | Diff(ppm) | z | Abund    | Formula                                                          | Ion                  |
|-----------|-----------|-----------|---|----------|------------------------------------------------------------------|----------------------|
| 267.13433 | 267.13393 | -1.5      | 1 | 64685.58 | C <sub>13</sub> H <sub>18</sub> N <sub>2</sub> O <sub>4</sub> H  | (M+H) <sup>+</sup>   |
| 266.1375  | 266.13703 | -1.74     | 1 | 9782.74  | C <sub>13</sub> H <sub>18</sub> N <sub>2</sub> O <sub>4</sub> H  | (M+H) <sup>+</sup>   |
| 269.13861 | 269.13927 | 2.47      | 1 | 936.54   | C <sub>13</sub> H <sub>18</sub> N <sub>2</sub> O <sub>4</sub> H  | (M+H) <sup>+</sup>   |
| 289.11546 | 289.11588 | 1.43      | 1 | 1426.28  | C <sub>13</sub> H <sub>18</sub> N <sub>2</sub> O <sub>4</sub> Na | (M+Na) <sup>+</sup>  |
| 290.12323 | 290.11898 | -14.64    | 1 | 172.7    | C <sub>13</sub> H <sub>18</sub> N <sub>2</sub> O <sub>4</sub> H  | (M+Na) <sup>+</sup>  |
| 305.08121 | 305.08982 | 28.19     | 1 | 5746.02  | C <sub>13</sub> H <sub>18</sub> N <sub>2</sub> O <sub>4</sub> H  | (M+K) <sup>+</sup>   |
| 306.08348 | 306.09291 | 30.82     | 1 | 869.02   | C <sub>13</sub> H <sub>18</sub> N <sub>2</sub> O <sub>4</sub> H  | (M+K) <sup>+</sup>   |
| 555.23952 | 555.24254 | 5.43      | 1 | 267.42   | C <sub>13</sub> H <sub>18</sub> N <sub>2</sub> O <sub>4</sub> Na | (2M+Na) <sup>+</sup> |
| 556.23884 | 556.24563 | 12.22     | 1 | 44.17    | C <sub>13</sub> H <sub>18</sub> N <sub>2</sub> O <sub>4</sub> Na | (2M+Na) <sup>+</sup> |

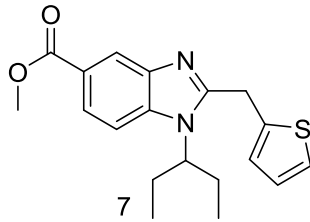

bareket\_LT105\_170629112152#3 RT: 0.08 AV: 1 NL: 5.82E6  
T: FTMS + c NSI Full ms [50.00-2000.00]

## Full MS

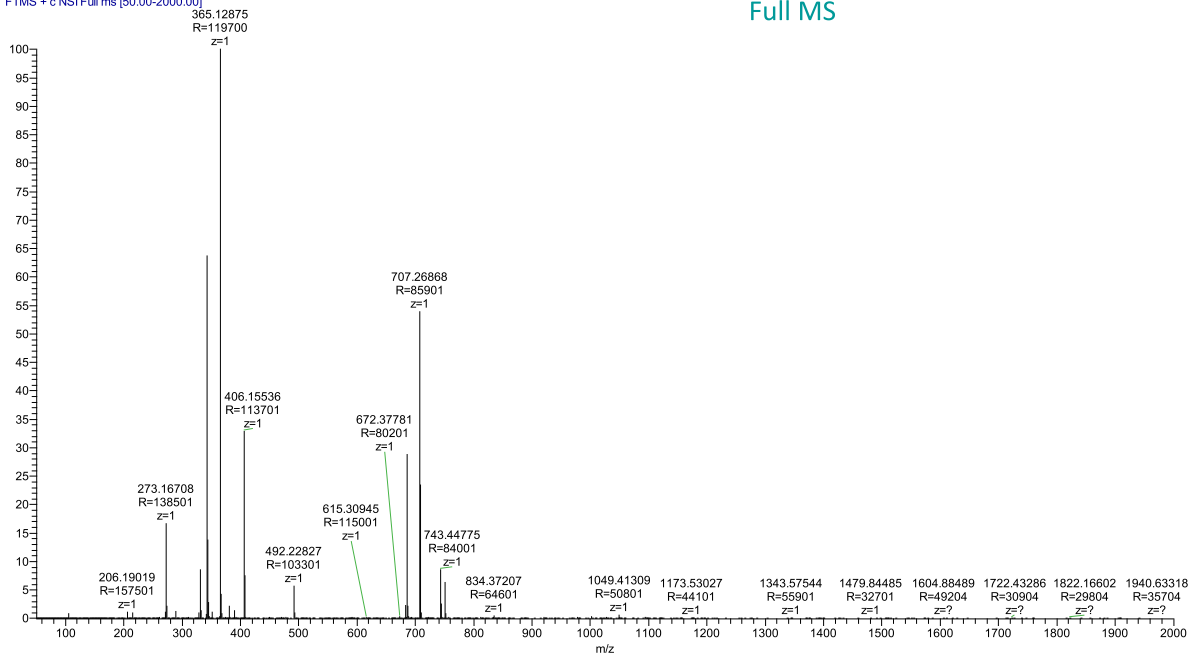

## Peak

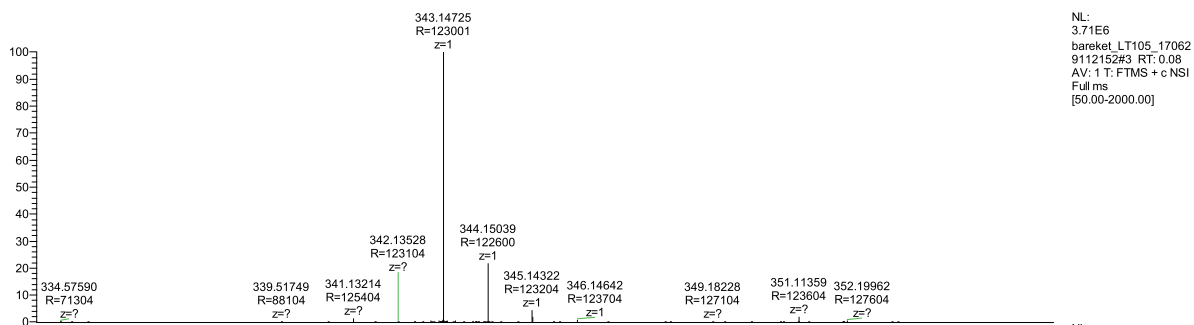

NL:  
3.71E6  
bareket\_LT105\_17062  
9112152#3 RT: 0.08  
AV: 1 T: FTMS + c NSI  
Full ms  
[50.00-2000.00]

## Theoretical peak

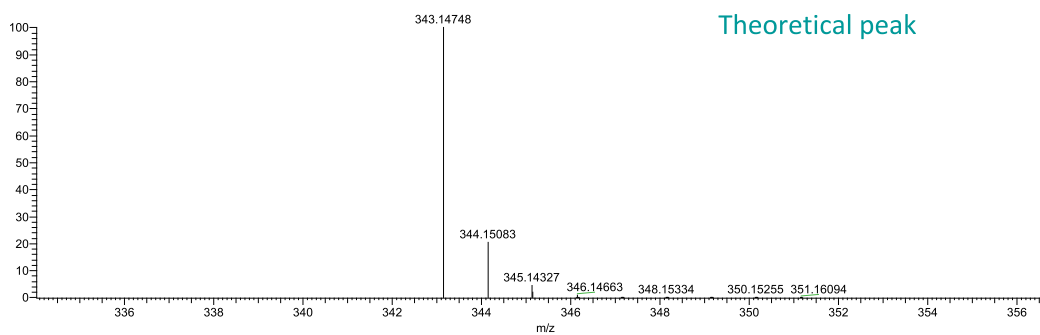

NL:  
7.62E5  
C<sub>19</sub>H<sub>22</sub>N<sub>2</sub>O<sub>2</sub>S +H:  
C<sub>19</sub>H<sub>23</sub>N<sub>2</sub>O<sub>2</sub>S 1  
p8 Chrg 1

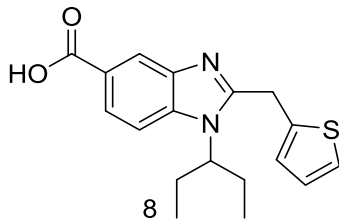

bareket LT106\_170702092508 #4 RT: 0.19 AV: 1 NL: 3.82E8  
T: FTMS + c NSI Full ms [50.00-2000.00]

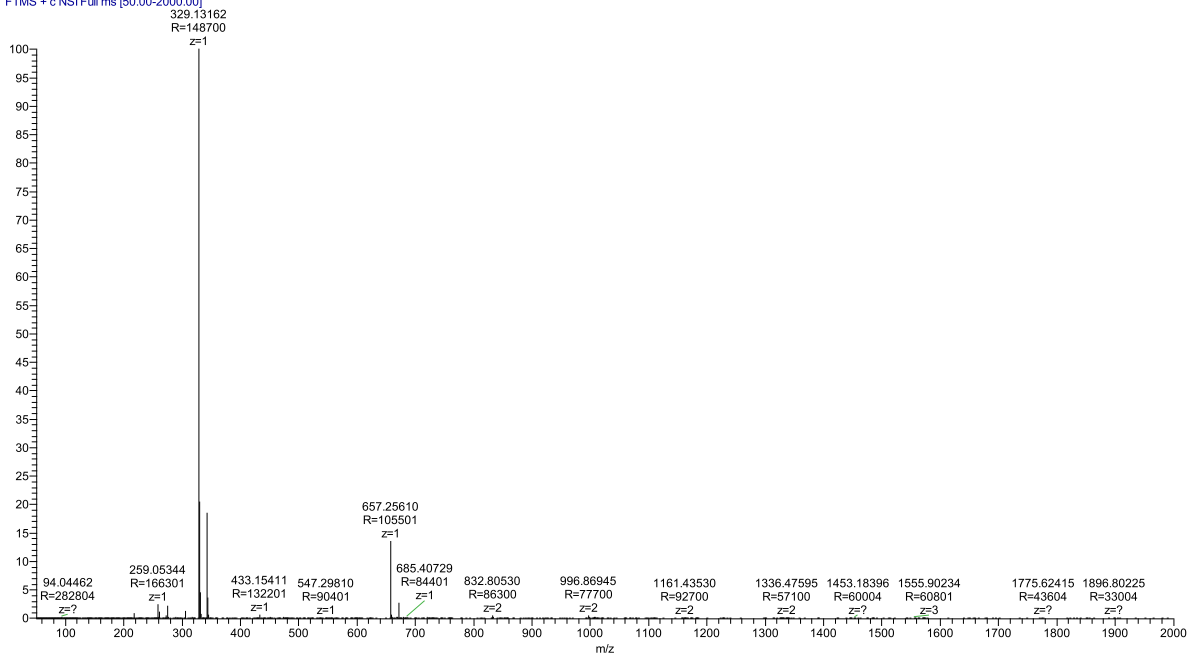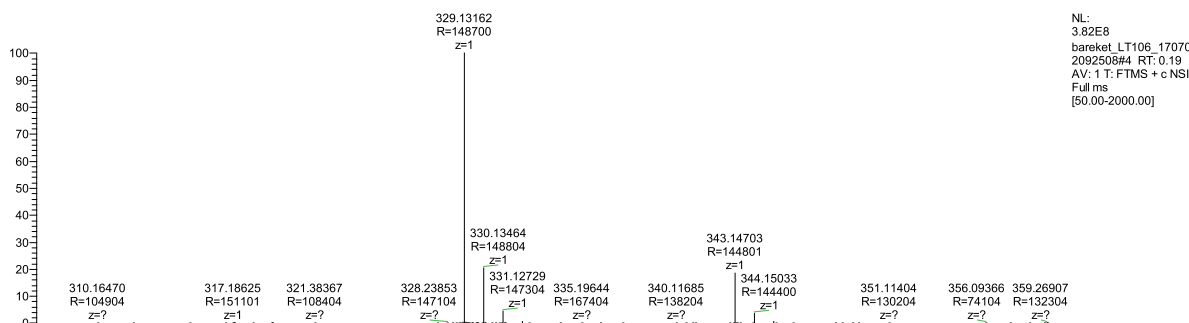

NL:  
3.82E8  
bareket LT106\_17070  
2092508#4 RT: 0.19  
AV: 1 T: FTMS + c NSI  
Full ms  
[50.00-2000.00]

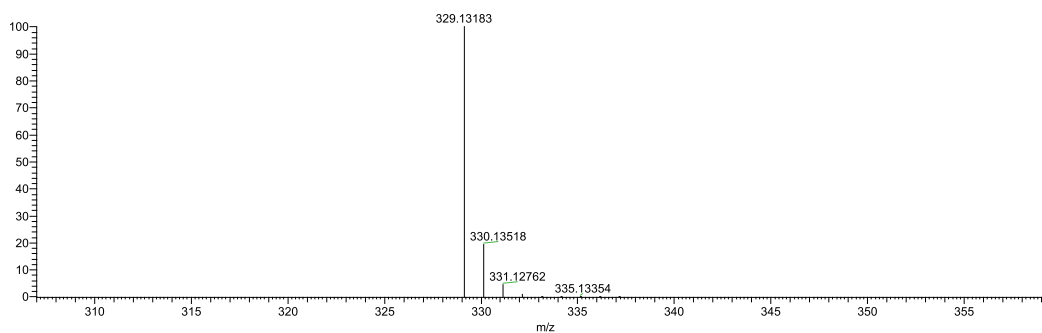

NL:  
7.71E5  
C<sub>18</sub>H<sub>20</sub>N<sub>2</sub>O<sub>2</sub>S +H:  
C<sub>18</sub>H<sub>21</sub>N<sub>2</sub>O<sub>2</sub>S<sub>1</sub>  
pa Chrg 1

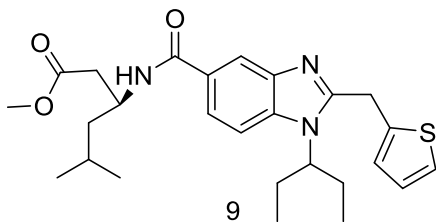

bareket\_LT108#11 RT: 0.38 AV: 1 NL: 1.77E5  
T: FTMS + p NSI Full ms [50.00-1500.00]

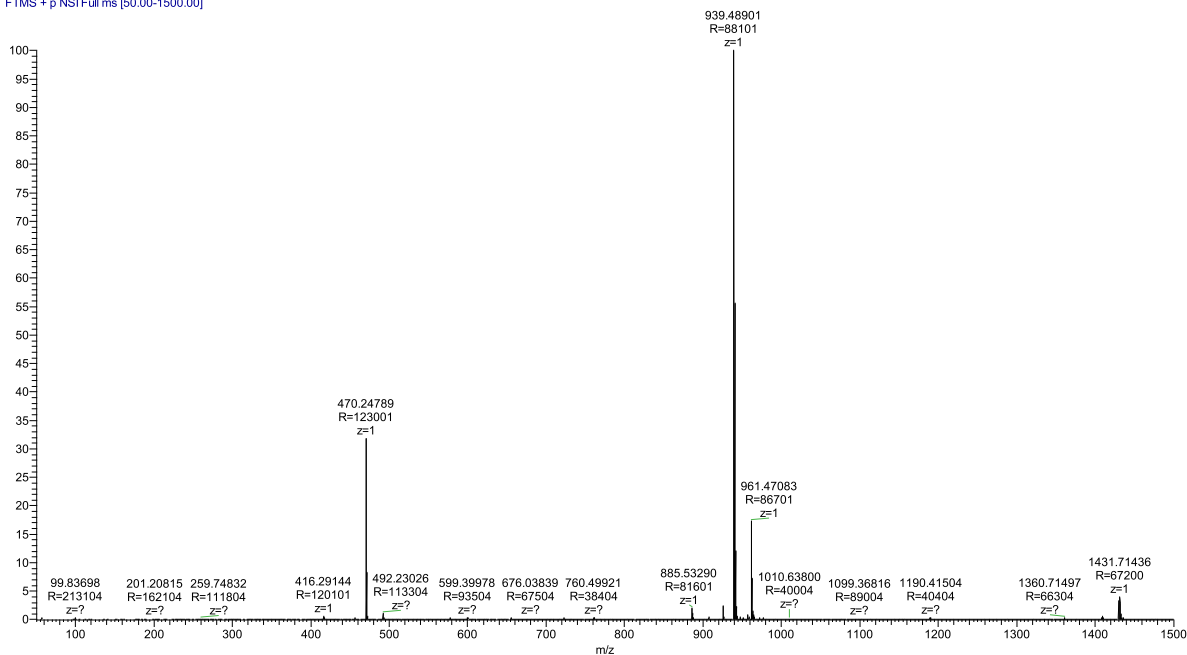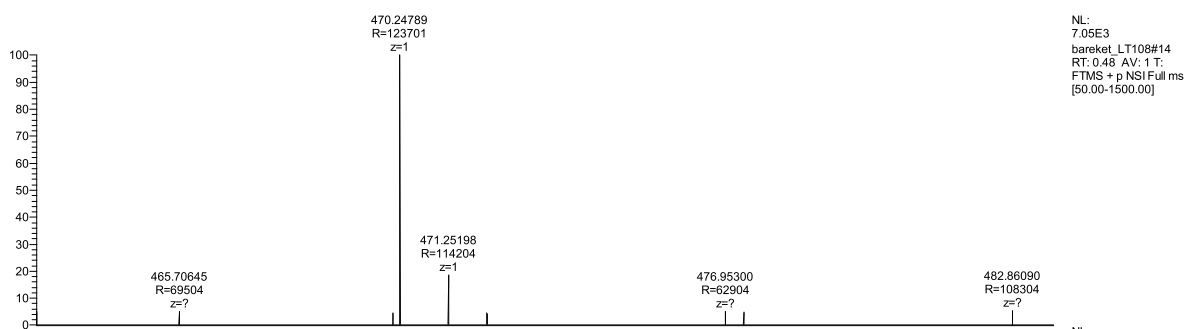

NL:  
7.05E3  
bareket\_LT108#14  
RT: 0.48 AV: 1 T:  
FTMS + p NSI Full ms  
[50.00-1500.00]

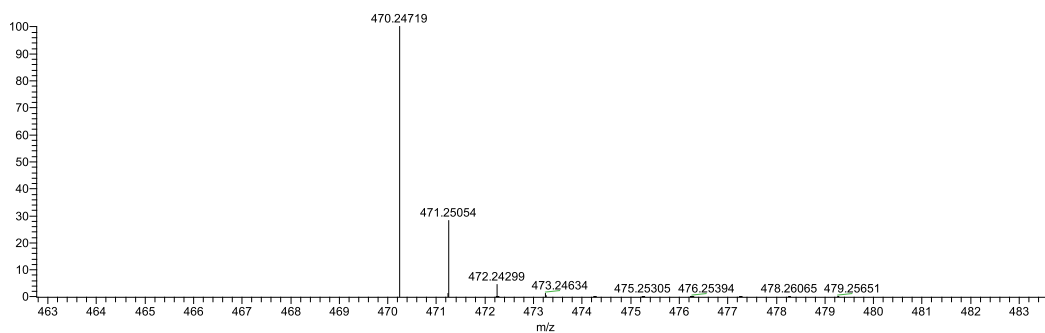

NL:  
7.02E5  
C<sub>26</sub>H<sub>35</sub>N<sub>3</sub>O<sub>3</sub>S +H:  
C<sub>26</sub>H<sub>36</sub>N<sub>3</sub>O<sub>3</sub>S 1  
p8 Chrg 1

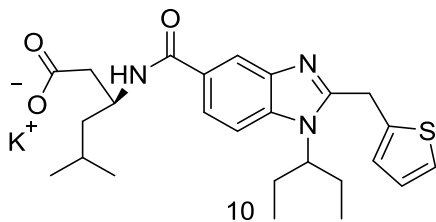

bareket\_LT109\_170702092508 #32 RT: 1.91 AV: 1 NL: 1.25E7  
T: FTMS + c NSI Full ms [50.00-2000.00]

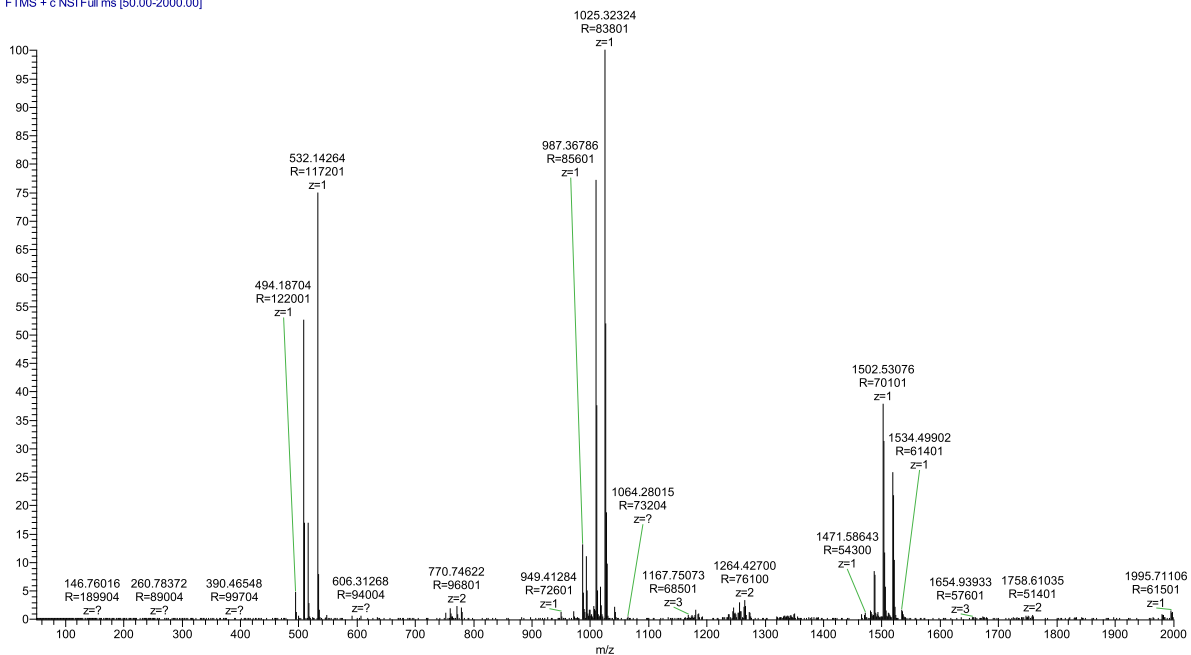

bareket\_LT109\_170702092508 #32 RT: 1.91 AV: 1 NL: 9.33E6  
T: FTMS + c NSI Full ms [50.00-2000.00]

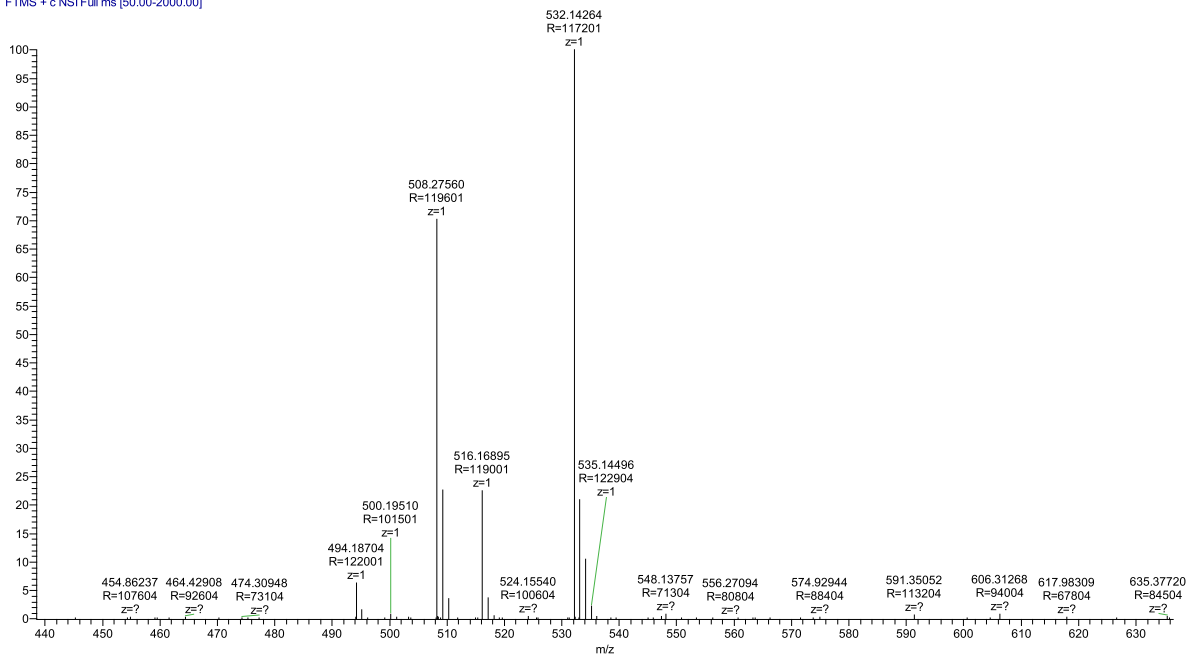

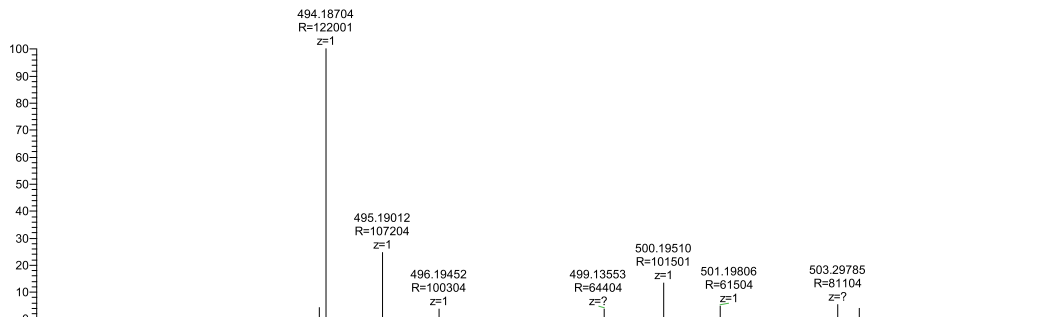

NL:  
5.92E5  
bareket\_LT109\_170702  
092505R32 RT: 1.91  
AV: 1 T: FTMS + c NSI  
Full ms [50.00-2000.00]

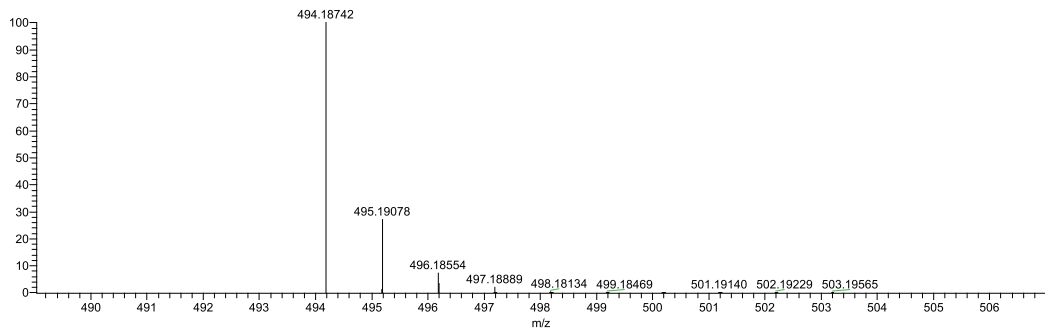

NL:  
6.62E5  
C<sub>25</sub>H<sub>32</sub>KN<sub>3</sub>O<sub>3</sub>S +H  
C<sub>25</sub>H<sub>33</sub>K<sub>1</sub>N<sub>3</sub>O<sub>3</sub>S<sub>1</sub>  
pa Chrg 1

### **3. Chiral HPLC report (methyl (S)-3-amino-5-methylhexanoate)**

(S)-3-Boc-amino-5-methyl hexanoic acid (HB108B)  
 (This is the chiral starting material used for this product.)

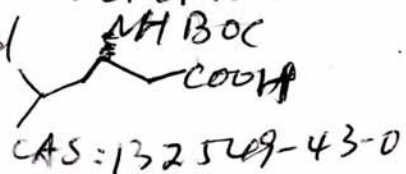

Chiral Hplc Report

CAS: 132509-43-0

Sample Information

Lot Number: HB108B+HB109B  
 Data File: HB108B+HB109B.lcd  
 Method File: 20-80-0.5-25-OJ-RH.lcm  
 Injection Time: 2016-9-21 12:49:21  
 Report Created: 2016-9-21 13:14:25  
 Sample Info: Column: CHIRALPAK OJ-RH (150\*4.6mm 5um)  
 Mobile Phase: H2O:ACN:FA=80:20:0.1  
 Flow: 0.5 ml/min  
 Temperature: 25 C  
 Wavelength: 214nm  
 Instrument: SHIMADZU 10A  
 Inj. Volume: 20 ul

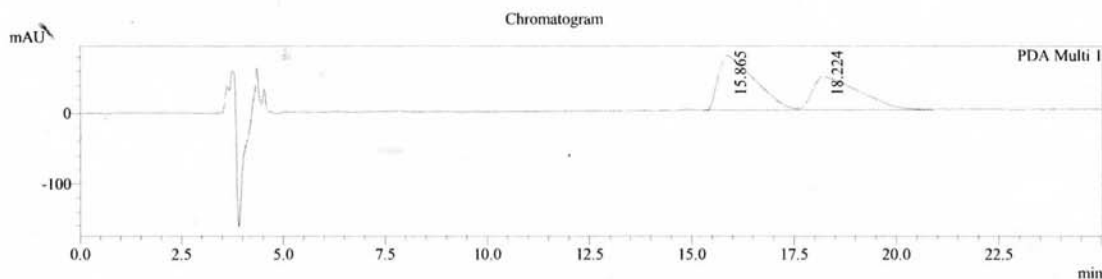

1 PDA Multi 1 / 214nm 4nm

PeakTable

PDA Ch1 214nm 4nm

| Peak# | Ret. Time | Area    | Height | Area %  | Height % |
|-------|-----------|---------|--------|---------|----------|
| 1     | 15.865    | 4715939 | 76999  | 56.168  | 61.729   |
| 2     | 18.224    | 3680256 | 47737  | 43.832  | 38.271   |
| Total |           | 8396195 | 124737 | 100.000 | 100.000  |

PeakTable

PDA Ch1 214nm 4nm

| Peak# | Ret. Time | Resolution | Tailing Factor |
|-------|-----------|------------|----------------|
| 1     | 15.865    | 0.000      | 2.327          |
| 2     | 18.224    | 1.163      | 2.215          |
| Total |           |            |                |

Spectrum

Peak# : 1  
 Retention Time : 15.865

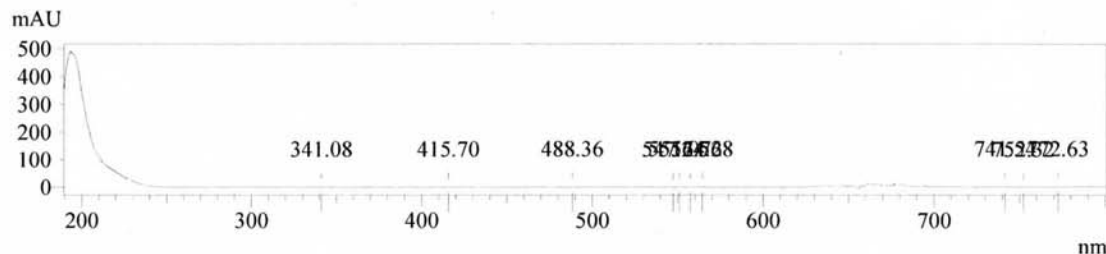

HB109B + HB108B (R+S)  
 (R-) (S-)



The chiral HPLC report for (S)-3-Boc-amino-5-methylhexanoic acid.

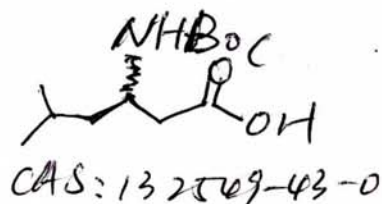

### Chiral Hplc Report

#### Sample Information

Lot Number: HB108B  
 Data File: HB108B.lcd  
 Method File: 20-80-0.5-25-OJ-RH.lcm  
 Injection Time: 2016-9-21 13:15:02  
 Report Created: 2016-9-21 13:40:13  
 Sample Info: Column: CHIRALPAK OJ-RH (150\*4.6mm 5um)  
 Mobile Phase: H2O:ACN:FA=80:20:0.1  
 Flow: 0.5 ml/min  
 Temperature: 25 C  
 Wavelength: 214nm  
 Instrument: SHIMADZU 10A  
 Inj. Volume: 20 ul

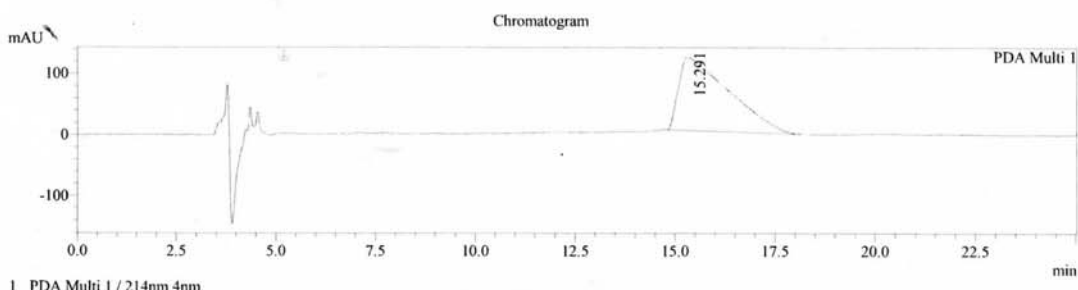

1 PDA Multi 1 / 214nm 4nm

#### PeakTable

PDA Ch1 214nm 4nm

| Peak# | Ret. Time | Area     | Height | Area %  | Height % |
|-------|-----------|----------|--------|---------|----------|
| 1     | 15.291    | 10358966 | 118676 | 100.000 | 100.000  |
| Total |           | 10358966 | 118676 | 100.000 | 100.000  |

#### PeakTable

PDA Ch1 214nm 4nm

| Peak# | Ret. Time | Resolution | Separation | Tailing Factor |
|-------|-----------|------------|------------|----------------|
| 1     | 15.291    | 0.000      | 0.000      | 3.356          |
| Total |           |            |            |                |

theoretical Plates/m

3378.736

#### Spectrum

Peak# : 1  
 Retention Time : 15.291

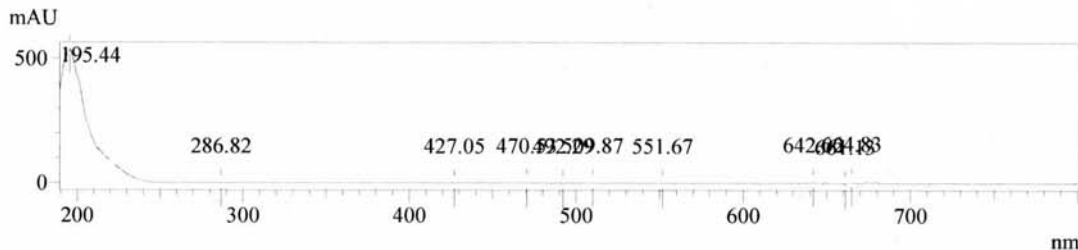

Peak# : 2  
Retention Time : 18.224

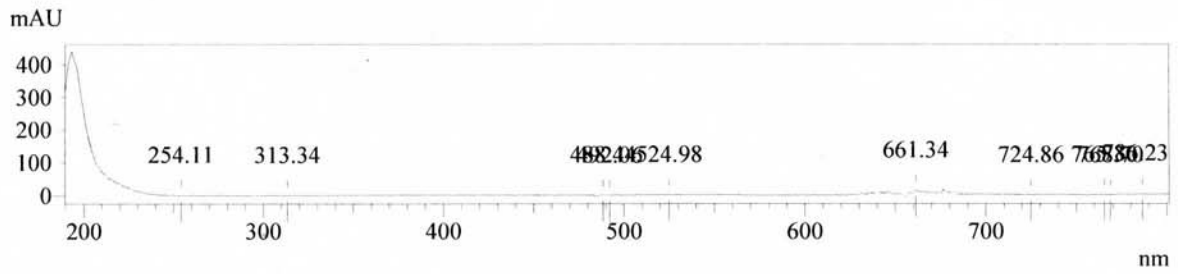

Supplement: NIHMS1551396-supplement-1.pdf [file NIHMS1551396-supplement-1.pdf]
